# Supplementary material
Source: PubMed Central journal article supplement (PMC2915693)

## Supplemental Tables

Supplemental Table I. Chemical shifts arising from Interferon-Hyp-polysaccharide-1 glycosyl and Hyp residues at 55°C. Two sets of chemical shifts for Hyp residues resulted from base hydrolysis during preparation of Hyp-AGs. Residue designations correspond to those in Figures 4 and 5

| Residues        |            | C-1/H-1       | C-2/H2       | C-3/H-3            | C-4/H-4      | C-5/H-5            | C-6/H-6            |
|-----------------|------------|---------------|--------------|--------------------|--------------|--------------------|--------------------|
|                 |            | ppm           |              |                    |              |                    |                    |
| A <sub>1</sub>  | t-Ara      | 107.542/5.087 | 81.047/4.135 | 76.665/3.960       | 84.171/4.099 | 61.440/3.833,3.723 |                    |
| A <sub>2</sub>  | 5-Ara      | 109.179/5.259 | 81.353/4.228 | 76.951/4.019       | 82.473/4.260 | 67.076/3.891,3.816 |                    |
| A <sub>3</sub>  | 3-Ara      | 109.179/5.261 | 81.200/4.220 | 83.877/3.955       | 84.098/4.147 | 61.440/3.833,3.723 |                    |
| A <sub>4</sub>  | t-Ara      | 107.542/5.087 | 81.047/4.135 | 76.665/3.960       | 84.171/4.099 | 61.440/3.833,3.723 |                    |
| A <sub>5</sub>  | 5-Ara      | 109.179/5.259 | 81.353/4.228 | 76.951/4.019       | 82.473/4.260 | 67.076/3.891,3.816 |                    |
| A <sub>6</sub>  | 3-Ara      | 109.179/5.261 | 81.200/4.220 | 83.877/3.955       | 84.098/4.147 | 61.440/3.833,3.723 |                    |
| A <sub>7</sub>  | t-Ara      | 109.179/5.264 | 81.352/4.228 | 76.665/3.960       | 84.171/4.099 | 61.440/3.833,3.723 |                    |
| A <sub>8</sub>  | t-Ara      | 109.179/5.264 | 81.352/4.228 | 76.665/3.960       | 84.171/4.099 | 61.440/3.833,3.723 |                    |
| R <sub>1</sub>  | t-Rha      | 100.746/4.797 | 70.451/3.948 | 70.582/3.750       | 72.223/3.538 | 69.178/4.021       | 16.628/1.267       |
| R <sub>2</sub>  | t-Rha      | 100.746/4.797 | 70.451/3.948 | 70.582/3.750       | 72.223/3.538 | 69.178/4.021       | 16.628/1.267       |
| UA <sub>1</sub> | 4-GlcUA    | 103.135/4.511 | 73.431/3.391 | 74.791/3.728       | 79.477/3.625 | 74.484/3.585       |                    |
| UA <sub>2</sub> | 4-GlcUA    | 103.135/4.511 | 73.090/3.361 | 75.858/3.716       | 79.477/3.625 | 74.484/3.585       |                    |
| G <sub>a</sub>  | 3,6-Gal(s) | 103.310/4.536 | 70.009/3.664 | 80.378/3.728       | 68.524/4.146 | 73.567/3.923       | 69.169/4.041,3.921 |
| G <sub>b</sub>  | 3,6-Gal(s) | 103.546/4.487 | 70.009/3.664 | 80.378/3.728       | 68.524/4.146 | 73.562/3.923       | 69.169/4.041,3.921 |
| G <sub>c</sub>  | 3-Gal(s)   | 103.556/4.447 | 70.838/3.607 | 80.378/3.728       | 68.590/4.112 | 72.497/3.691       | 61.068/3.784       |
| G <sub>d</sub>  | 3-Gal(s)   | 103.201/4.406 | 70.947/3.557 | 80.378/3.728       | 68.590/4.112 | 72.497/3.691       | 61.068/3.784       |
| G <sub>1</sub>  | 3,6-Gal(b) | 101.439/4.571 | 70.030/3.689 | 82.129/3.854       | 68.546/4.232 | 72.869/3.662       | 69.465/4.041,3.921 |
| G <sub>2</sub>  | 3,6-Gal(b) | 103.920/4.691 | 70.030/3.689 | 81.939/3.812       | 68.546/4.232 | 72.869/3.662       | 70.098/4.041,3.921 |
| G <sub>3</sub>  | 6-Gal(b)   | 104.363/4.644 | 71.920/3.539 | 72.869/3.662       | 69.092/3.903 | 74.943/3.730       | 70.435/4.041,3.921 |
| G <sub>4</sub>  | 3,6-Gal(b) | 103.800/4.703 | 70.030/3.689 | 82.135/3.868       | 68.542/4.232 | 72.869/3.662       | 69.185/4.041,3.921 |
| G <sub>5</sub>  | 3,6-Gal(b) | 103.800/4.703 | 70.030/3.689 | 81.821/3.893       | 68.542/4.232 | 72.869/3.662       | 69.986/4.041,3.921 |
| G <sub>6</sub>  | t-Gal(b)   | 103.695/4.725 | 71.920/3.539 | 72.869/3.662       | 69.092/3.903 | 75.357/3.712       | 61.068/3.784       |
|                 | set 1      |               | 59.978/4.356 | 35.130/2.650,2.214 | 78.020/4.786 | 51.889/3.683,3.569 |                    |
| Hyp             | set 2      |               | 59.978/4.244 | 34.895/2.564,2.452 | 77.303/4.708 | 51.999/3.774,3.483 |                    |

Supplemental Table II. Chemical shifts arising from Interferon-Hyp-polysaccharide-1 glycosyl and Hyp residues at 25°C. Two sets of chemical shifts for Hyp residues and G<sub>1</sub> resulted from base hydrolysis during preparation of Hyp-AGs. Residue designations correspond to those shown in Figures 4 and 5

| Residues        |            | C-1/H-1        | C-2/H2       | C-3/H-3            | C-4/H-4      | C-5/H-5            | C-6/H-6            |
|-----------------|------------|----------------|--------------|--------------------|--------------|--------------------|--------------------|
|                 |            | ppm            |              |                    |              |                    |                    |
| A <sub>1</sub>  | t-Ara      | 107.411/5.075  | 80.899/4.128 | 76.559/3.946       | 83.941/4.089 | 61.232/3.824,3.718 |                    |
| A <sub>2</sub>  | 5-Ara      | 109.250/5.252  | 81.316/4.224 | 76.721/4.009       | 82.330/4.243 | 66.747/3.875,3.795 |                    |
| A <sub>3</sub>  | 3-Ara      | 109.250/5.264  | 81.018/4.223 | 83.781/3.938       | 83.880/4.053 | 61.213/3.825,3.695 |                    |
| A <sub>4</sub>  | t-Ara      | 107.411/5.075  | 80.899/4.128 | 76.559/3.946       | 83.941/4.089 | 61.232/3.824,3.718 |                    |
| A <sub>5</sub>  | 5-Ara      | 109.250/5.252  | 81.316/4.224 | 76.721/4.009       | 82.330/4.243 | 66.747/3.875,3.795 |                    |
| A <sub>6</sub>  | 3-Ara      | 109.250/5.264  | 81.018/4.223 | 83.781/3.938       | 83.880/4.053 | 61.213/3.825,3.695 |                    |
| A <sub>7</sub>  | t-Ara      | 109.250/~5.241 | 81.298/4.207 | 76.547/3.939       | 83.788/4.119 | 61.189/3.827,3.696 |                    |
| A <sub>8</sub>  | t-Ara      | 109.250/~5.241 | 81.298/4.207 | 76.547/3.939       | 83.788/4.119 | 61.189/3.827,3.696 |                    |
| R <sub>1</sub>  | t-Rha      | 100.801/4.732  | 70.203/3.934 | 70.115/3.756       | 71.950/3.430 | 69.137/4.020       | 16.442/1.255       |
| R <sub>2</sub>  | t-Rha      | 100.801/4.732  | 70.203/3.934 | 70.115/3.756       | 71.950/3.430 | 69.137/4.020       | 16.442/1.255       |
| UA <sub>1</sub> | 4-GlcUA    | 102.685/4.505  | 73.283/3.367 | 74.286/3.570       | 79.245/3.577 | 76.191/3.741       |                    |
| UA <sub>2</sub> | 4-GlcUA    | 102.685/4.505  | 72.855/3.337 | 75.483/3.516       | 79.175/3.589 | 75.476/3.712       |                    |
| G <sub>a</sub>  | 3,6-Gal(s) | 103.149/4.532  | 69.879/3.658 | 80.185/3.758       | 68.468/4.141 | 73.139/3.948       | 69.394/4.026,3.913 |
| G <sub>b</sub>  | 3,6-Gal(s) | 103.149/4.492  | 69.879/3.663 | 80.185/3.724       | 68.505/4.106 | 73.139/3.948       | 69.394/4.026,3.913 |
| G <sub>c</sub>  | 3-Gal(s)   | 103.615/4.432  | 70.652/3.527 | 80.196/3.646       | 69.278/3.925 | 75.030/3.692       | 60.970/3.768       |
| G <sub>d</sub>  | 3-Gal(s)   | 103.251/4.388  | 70.738/3.581 | 80.196/3.662       | 69.278/3.944 | 75.030/3.692       | 60.970/3.768       |
|                 | 3,6-Gal(b) |                |              |                    |              |                    |                    |
| G <sub>1</sub>  | Set 1      | 101.257/4.565  | 69.870/3.681 | 81.853/3.859       | 68.488/4.239 | 75.097/3.680       | 69.201/4.026,3.913 |
|                 | Set 2      | 101.89/4.485   |              |                    |              |                    |                    |
| G <sub>2</sub>  | 3,6-Gal(b) | 103.868/4.686  | 70.115/3.763 | 81.801/3.869       | 68.462/4.248 | 75.097/3.680       | 69.171/4.026,3.913 |
| G <sub>3</sub>  | 6-Gal(b)   | 104.305/4.622  | 69.857/3.615 | 72.456/3.663       | 69.171/3.924 | 74.885/3.689       | 69.433/4.031,3.913 |
| G <sub>4</sub>  | 3,6-Gal(b) | 103.851/4.708  | 70.135/3.774 | 81.689/3.882       | 68.478/4.238 | 76.758/3.994       | 69.171/4.026,3.913 |
| G <sub>5</sub>  | 3,6-Gal(b) | 103.772/4.723  | 70.235/3.777 | 81.668/3.879       | 68.478/4.252 | 76.758/3.994       | 69.171/4.026,3.913 |
| G <sub>6</sub>  | t-Gal(b)   | 103.887/4.660  | 70.333/3.774 | 71.734/3.714       | 68.940/3.955 | 75.032/3.772       | 60.968/3.778       |
| Hyp             | set 1      | 173.98         | 59.800/4.336 | 35.186/2.635,2.173 | 77.970/4.780 | 51.980/3.675,3.540 |                    |
|                 | set 2      |                | 59.800/4.236 | 34.952/2.524,2.438 | 77.364/4.693 | 52.010/3.765,3.450 |                    |

Supplemental Table III. NOE assignments of Interferon-Hyp-polysaccharide-1 at 25°C. Italicized sections highlight the NOEs between Hyp and Gal residue G1, bolded sections highlight non-sequential NOEs and corresponding residues, sequential NOEs are neither bolded nor italicized. When two distinct proton pair sets produced the same NOEs both pairs are presented.

| NOEs               | Assignments                                                                                                                |
|--------------------|----------------------------------------------------------------------------------------------------------------------------|
| <i>4.790/4.579</i> | <i>Hyp-H4/G<sub>1</sub>-H1</i>                                                                                             |
| <i>4.791/4.240</i> | <i>Hyp-H4/G<sub>1</sub>-H4</i>                                                                                             |
| <i>4.576/3.532</i> | <i>G<sub>1</sub>-H1/Hyp-H5</i>                                                                                             |
| <i>4.789/3.863</i> | <i>Hyp-H4/G<sub>1</sub>-H3</i>                                                                                             |
| <b>5.241/4.526</b> | <b>A<sub>7</sub>-H1 or A<sub>8</sub>-H1/G<sub>a</sub>-H1</b>                                                               |
| <b>5.233/4.500</b> | <b>A<sub>7</sub>-H1 or A<sub>8</sub>-H1/G<sub>b</sub>-H1 or UA<sub>1</sub>-H1 or UA<sub>2</sub>-H1</b>                     |
| <b>5.262/4.511</b> | <b>A<sub>6</sub>-H1, or A<sub>3</sub>-H1/UA<sub>1</sub>-H1, or UA<sub>2</sub>-H1</b>                                       |
| <b>4.709/4.146</b> | <b>G<sub>4</sub>-H1/G<sub>a</sub>-H4, or A<sub>1</sub>-H2, or A<sub>4</sub>-H2</b>                                         |
| <b>4.518/4.245</b> | <b>UA<sub>1</sub>-H1 or UA<sub>2</sub>-H1 or G<sub>a</sub>-H1/A<sub>6</sub>-H4 or A<sub>2</sub>-H4 or G<sub>2</sub>-H4</b> |
| <b>5.237/4.694</b> | <b>A<sub>7</sub>-H1 or A<sub>8</sub>-H1/G<sub>2</sub>-H1</b>                                                               |
| <b>5.265/4.700</b> | <b>A<sub>3</sub>-H1 or A<sub>6</sub>-H1 /G<sub>4</sub>-H1</b>                                                              |
| 4.690/4.245        | G <sub>2</sub> -H1/G <sub>1</sub> -H4                                                                                      |
| 4.677/4.217        | G <sub>6</sub> -H1/G <sub>5</sub> -H4                                                                                      |
| 4.710/4.038        | G <sub>4</sub> -H1/G <sub>3</sub> -H61                                                                                     |
| 4.706/3.913        | G <sub>4</sub> -H1/G <sub>3</sub> -H62                                                                                     |
| 4.392/4.251        | G <sub>4</sub> -H1/G <sub>5</sub> -H4                                                                                      |
| 4.436/4.237        | G <sub>c</sub> -H1/G <sub>4</sub> -H4                                                                                      |
| 4.620/3.870        | G <sub>3</sub> -H1/G <sub>2</sub> -H3                                                                                      |
| 4.616/3.767        | G <sub>3</sub> -H1/G <sub>2</sub> -H2                                                                                      |
| 4.013/5.085        | A <sub>2</sub> -H3/A <sub>1</sub> -H1, or A <sub>5</sub> -H3/A <sub>4</sub> -H1                                            |
| 5.265/3.645        | A <sub>3</sub> -H1/G <sub>a</sub> -H2, or A <sub>6</sub> -H1/G <sub>b</sub> -H2                                            |
| 4.220/3.647        | A <sub>3</sub> -H2/G <sub>a</sub> -H2, or A <sub>6</sub> -H2/G <sub>b</sub> -H2                                            |
| 5.241/3.653        | A <sub>7</sub> -H1/G <sub>c</sub> -H3 or A <sub>8</sub> -H1/G <sub>d</sub> -H3                                             |
| 3.726/4.683        | G <sub>b</sub> -H3/G <sub>2</sub> -H1                                                                                      |
| 3.520/4.045        | UA <sub>2</sub> -H3/G <sub>b</sub> -H62                                                                                    |
| 4.436/4.702        | G <sub>c</sub> -H1/G <sub>4</sub> -H1                                                                                      |
| 4.574/4.687        | G <sub>1</sub> -H1/G <sub>2</sub> -H1                                                                                      |
| 4.724/3.568        | R <sub>1</sub> -H1/UA <sub>1</sub> -H4 or R <sub>2</sub> -H1/UA <sub>2</sub> -H4                                           |
| 4.724/3.373        | R <sub>1</sub> -H1/UA <sub>1</sub> -H2                                                                                     |
| 4.029/3.566        | R <sub>1</sub> -H5/UA <sub>1</sub> -H3                                                                                     |
| 3.373/4.020        | UA <sub>1</sub> -H2/G <sub>a</sub> -H61                                                                                    |
| 3.372/3.879        | UA <sub>1</sub> -H2/G <sub>a</sub> -H62                                                                                    |
| 3.371/3.921        | UA <sub>1</sub> -H2/G <sub>a</sub> -H5                                                                                     |
| 3.374/4.137        | UA <sub>1</sub> -H2/G <sub>a</sub> -H4                                                                                     |
| 4.505/4.032        | UA <sub>1</sub> -H1/G <sub>a</sub> -H61                                                                                    |
| 4.505/3.888        | UA <sub>1</sub> -H1/G <sub>a</sub> -H62                                                                                    |
| 3.351/3.891        | UA <sub>2</sub> -H2/G <sub>b</sub> -H61                                                                                    |
| 3.348/4.045        | UA <sub>2</sub> -H2/G <sub>b</sub> -H62                                                                                    |
| 4.506/3.912        | UA <sub>2</sub> -H1/G <sub>b</sub> -H61                                                                                    |
| 4.247/5.086        | A <sub>2</sub> -H4/A <sub>1</sub> -H1 or A <sub>5</sub> -H4/A <sub>4</sub> -H1                                             |
| 3.886/5.086        | A <sub>2</sub> -H51/A <sub>1</sub> -H1 or A <sub>5</sub> -H51/A <sub>4</sub> -H1                                           |
| 3.798/5.086        | A <sub>2</sub> -H52/A <sub>1</sub> -H1 or A <sub>5</sub> -H52/A <sub>4</sub> -H1                                           |
| 4.540/4.039        | G <sub>a</sub> -H1/G <sub>1</sub> -H61                                                                                     |

---

|             |                                                                                   |
|-------------|-----------------------------------------------------------------------------------|
| 4.490/4.245 | G <sub>6</sub> -H1/G <sub>2</sub> -H4                                             |
| 4.394/3.902 | G <sub>4</sub> -H1/G <sub>5</sub> -H61                                            |
| 4.395/4.028 | G <sub>4</sub> -H1/G <sub>5</sub> -H62                                            |
| 4.440/4.037 | G <sub>c</sub> -H1/G <sub>4</sub> -H61                                            |
| 4.440/3.891 | G <sub>c</sub> -H1/G <sub>4</sub> -H62                                            |
| 4.618/4.241 | G <sub>3</sub> -H1/G <sub>2</sub> -H4                                             |
| 5.084/4.245 | A <sub>1</sub> -H1/A <sub>2</sub> -H4, or A <sub>4</sub> -H1/A <sub>5</sub> -H4   |
| 5.084/3.801 | A <sub>1</sub> -H1/A <sub>2</sub> -H51, or A <sub>4</sub> -H1/A <sub>5</sub> -H51 |
| 5.085/3.887 | A <sub>1</sub> -H1/A <sub>2</sub> -H52, or A <sub>4</sub> -H1/A <sub>5</sub> -H52 |

---

Supplemental Table IV. Chemical shifts (collected at 55 °C) arising from Interferon-Hyp-polysaccharide-2 glycosyl and Hyp residues. Residue designations correspond to those shown in Figure 5

| Residues        |            | C-1/H-1    | C-2/H2    | C-3/H-3        | C-4/H-4   | C-5/H-5        | C-6/H-6        |
|-----------------|------------|------------|-----------|----------------|-----------|----------------|----------------|
|                 |            | Ppm        |           |                |           |                |                |
| A <sub>1</sub>  | t-Ara      | 108.0/5.08 | 81.4/4.21 | 77.1/3.94      | 84.4/4.13 | 61.6/3.71,3.82 |                |
| A <sub>2</sub>  | 5-Ara      | 109.4/5.24 | 81.4/4.21 | 77.5/4.00      | 84.4/4.13 | 67.1/3.79,3.88 |                |
| A <sub>3</sub>  | 3-Ara      | 109.4/5.24 | 81.1/4.12 | 82.9/4.24      | 84.0/4.09 | 61.6/3.71,3.82 |                |
| A <sub>4</sub>  | t-Ara      | 109.4/5.24 | 81.4/4.21 | 77.1/3.94      | 84.4/4.13 | 61.6/3.71,3.82 |                |
| A <sub>5</sub>  | 3-Ara      | 109.4/5.24 | 81.1/4.12 | 82.9/4.24      | 84.0/4.09 | 61.6/3.71,3.82 |                |
| R <sub>1</sub>  | t-Rha      | 101.1/4.79 | 71.0/3.93 | 70.7/3.69      | 72.5/3.53 | 68.2/4.02      | 17.0/1.25      |
| UA <sub>1</sub> | t-GlcUA    | 102.9/4.52 | 73.8/3.39 | 76.2/3.78      | 71.3/3.53 | 75.8/3.52      |                |
| UA <sub>2</sub> | 4-GlcUA    | 102.9/4.52 | 73.1/3.34 | 77.0/3.75      | 79.5/3.62 | 74.8/3.58      |                |
| UA <sub>3</sub> | t-GlcUA    | 102.9/4.52 | 73.8/3.39 | 76.2/3.78      | 71.3/3.53 | 75.8/3.52      |                |
| UA <sub>4</sub> | t-GlcUA    | 102.9/4.52 | 73.8/3.39 | 76.2/3.78      | 71.3/3.53 | 75.8/3.52      |                |
| G <sub>a</sub>  | 3,6-Gal(s) | 103.5/4.49 | 70.4/3.66 | 80.5/3.72      | 68.5/4.13 | 74.0/3.92      | 69.5/4.03,3.92 |
| G <sub>b</sub>  | 3,6-Gal(s) | 103.5/4.49 | 70.4/3.66 | 80.5/3.72      | 68.5/4.13 | 74.0/3.92      | 69.5/4.03,3.92 |
| G <sub>c</sub>  | 6-Gal(s)   | 104.0/4.43 | 71.9/3.53 | 73.1/3.60      | 68.2/3.93 | 75.1/3.73      | 69.5/4.03,3.92 |
| G <sub>d</sub>  | 6-Gal(s)   | 103.7/4.39 | 71.9/3.53 | 73.1/3.60      | 68.2/3.93 | 75.1/3.73      | 69.5/4.03,3.92 |
| G <sub>1</sub>  | 3,6-Gal(b) | 101.8/4.56 | 70.4/3.66 | 82.2/3.83      | 68.5/4.22 | 73.0/3.68      | 70.3/4.03,3.92 |
| G <sub>2</sub>  | 3,6-Gal(b) | 104.2/4.68 | 70.4/3.66 | 82.2/3.85      | 68.5/4.22 | 73.0/3.68      | 70.3/4.03,3.92 |
| G <sub>3</sub>  | 6-Gal(b)   | 104.2/4.68 | 71.9/3.53 | 73.1/3.68      | 68.2/3.93 | 75.1/3.73      | 71.0/4.03,3.92 |
| G <sub>4</sub>  | 3,6-Gal(b) | 104.2/4.68 | 70.4/3.66 | 82.2/3.86      | 68.5/4.22 | 73.0/3.68      | 69.5/4.03,3.92 |
| G <sub>5</sub>  | 3,6-Gal(b) | 104.2/4.71 | 70.4/3.66 | 82.2/3.88      | 68.5/4.22 | 73.0/3.68      | 69.5/4.03,3.92 |
| G <sub>6</sub>  | t-Gal(b)   | 104.2/4.71 | 71.9/3.53 | 73.1/3.64      | 68.2/3.93 | 76.0/3.71      | 61.2/3.77      |
|                 | set 1      |            | 60.5/4.34 | 35.2/2.62,2.20 | 78.4/4.78 | 52.0/3.56,3.67 |                |
| Hyp             | set 2      |            | 60.2/4.23 | 35.0/2.44,2.55 | 77.6/4.69 | 52.3/3.47,3.77 |                |

Supplemental Table V. Chemical shifts (collected at 60 °C) arising from Ala-Hyp-polysaccharide-2 glycosyl and Hyp residues. The residue labeling corresponds to the labeling in Figure 5.

| Residues        |                       | C-1/H-1    | C-2/H2    | C-3/H-3        | C-4/H-4   | C-5/H-5        | C-6/H-6        |
|-----------------|-----------------------|------------|-----------|----------------|-----------|----------------|----------------|
|                 |                       | ppm        |           |                |           |                |                |
| A <sub>1</sub>  | t-Ara                 | 110.3/5.25 | 82.3/4.21 | 77.7/3.95      | 85.1/4.13 | 62.4/3.71,3.82 |                |
| A <sub>2</sub>  | t-Ara                 | 110.3/5.25 | 82.3/4.21 | 77.7/3.95      | 85.1/4.13 | 62.4/3.71,3.82 |                |
| R <sub>1</sub>  | t-Rha                 | 101.7/4.81 | 71.4/3.95 | 71.4/3.78      | 73.2/3.42 | 70.1/4.02      | 17.6/1.25      |
| R <sub>2</sub>  | t-Rha                 | 101.7/4.81 | 71.4/3.95 | 71.4/3.78      | 73.2/3.42 | 70.1/4.02      | 17.6/1.25      |
| UA <sub>1</sub> | 4-GlcUA               | 103.7/4.51 | 74.4/3.45 | 77.4/3.73      | 80.2/3.63 | 75.5/3.56      |                |
| UA <sub>2</sub> | 4-GlcUA               | 103.7/4.51 | 74.4/3.45 | 77.4/3.73      | 80.2/3.63 | 75.5/3.56      |                |
| G <sub>a</sub>  | 3,6-Gal <sub>sc</sub> | 104.5/4.47 | 71.7/3.65 | 81.7/3.71      | 69.6/4.11 | 74.7/3.91      | 70.5/4.04,3.94 |
| G <sub>b</sub>  | 3,6-Gal <sub>sc</sub> | 104.6/4.48 | 71.7/3.65 | 81.7/3.71      | 69.6/4.11 | 74.7/3.91      | 70.5/4.04,3.94 |
| G <sub>1</sub>  | 3,6-Gal <sub>bb</sub> | 102.5/4.57 | 71.6/3.65 | 83.0/3.87      | 69.7/4.23 | 74.8/3.77      | 70.5/4.04,3.94 |
| G <sub>2</sub>  | 3,6-Gal <sub>bb</sub> | 105.0/4.64 | 71.6/3.65 | 83.0/3.85      | 69.7/4.23 | 74.8/3.77      | 70.5/4.04,3.94 |
| G <sub>3</sub>  | 6-Gal <sub>bb</sub>   | 105.0/4.67 | 72.7/3.54 | 74.0/3.65      | 70.0/3.92 | 74.8/3.77      | 70.5/4.04,3.94 |
| G <sub>4</sub>  | 3-Gal <sub>bb</sub>   | 105.0/4.68 | 71.6/3.65 | 83.0/3.87      | 69.7/4.12 | 76.0/3.70      | 62.3/3.78      |
| G <sub>5</sub>  | 3-Gal <sub>bb</sub>   | 105.0/4.69 | 71.6/3.65 | 83.0/3.87      | 69.7/4.12 | 76.0/3.70      | 62.3/3.78      |
| G <sub>6</sub>  | t-Gal <sub>bb</sub>   | 105.0/4.72 | 72.7/3.54 | 74.0/3.65      | 70.5/3.93 | 76.2/3.70      | 62.3/3.78      |
|                 | set 1                 |            | 61.0/4.32 | 36.5/2.62,2.19 | 79.1/4.77 | 52.9/3.54,3.64 |                |
| Hyp             | set 2                 |            | 61.3/4.21 | 36.1/2.40,2.55 | 78.4/4.68 | 52.9/3.47,3.77 |                |

## Supplemental Figure Legends

Supplemental Figure 1. A TOSCY spectrum of Interferon-Hyp-polysaccharide-1 collected at 55°C aided in the assignment of  $^1\text{H}$  chemical shifts and Cross-peaks A indicated side-chain Gal residues  $G_c$  and  $G_d$  were substituted at position 3.

Supplemental Figure 2. DOSY spectrum of Interferon-Hyp-polysaccharide-1 collected at 25°C used to calculate the diffusion coefficient.

Supplemental Figure 3. NOESY spectrum of Interferon-Hyp-polysaccharide-1 (25 °C).

Supplemental Figure 4.  $^1\text{H}$  NMR Spectrum of Hyp-AG Interferon-Hyp-polysaccharide-2 collected at 55 °C. Signals A and B were assigned to H-1 of  $\alpha$ -L-Ara, signal C to H-1  $\alpha$ -L-Rha, signal D (shoulder of C) to H-4 of Hyp, and signal E to the  $\beta$ -D-Gal residues of the galactan backbone. Signal F was assigned to H-1 of  $\beta$ -D-Gal linked to Hyp, and signal G to H-1 of side-chain  $\beta$ -D-Gal and  $\beta$ -D-GlcUA residues.

Supplemental Figure 5. 2D TOCSY spectrum of Interferon-Hyp-polysaccharide-2 collected at 55 °C. The spectrum was used for  $^1\text{H}$  chemical shift assignments. Based on our earlier work (15) Signal A indicated the side-chain Gal residues  $G_c$  and  $G_d$  were unsubstituted at position 3.

Supplemental Figure 6. HSQC Spectrum of Hyp-AG Interferon-Hyp-polysaccharide-2 collected at 55 °C. All labelling corresponds to those featured in Figure 2.

Supplemental Figure 7. HMBC Spectrum of Hyp-AG Interferon-Hyp-polysaccharide-2 collected at 55°C. All labelling corresponds to those featured in Figure 3.

Supplemental Figure 8. HSQC spectrum of Ala-Hyp-polysaccharide-2 collected at 60 °C. All labelling corresponds to those featured in Figure 2.

Supplemental Figure 9. HMBC spectrum of Ala-Hyp-polysaccharide-2 collected at 60 °C. All labelling corresponds to those featured in Figure 3.

Supplemental Figure 10. A stable folded conformer of Interferon Hyp-polysaccharide-1 depicts a 'reverse-turn' galactan backbone (dark blue) with carboxylate chelation of a calcium ion (yellow) by sidechain glucuronic acid residues (purple). Peripheral  $\alpha$ -L-arabinosyl trisaccharides are depicted by light blue 5-membered rings and sidechain Gal residues by light blue 6-membered rings. Not all residues are visible in this presentation.

Supplemental Figure 1

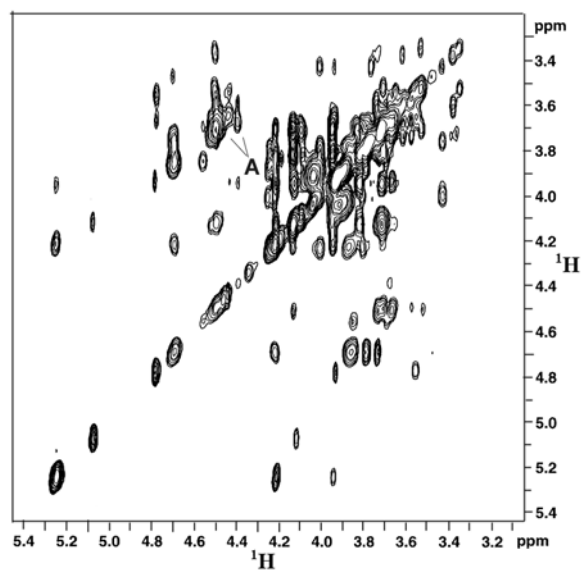



Supplemental Figure 2

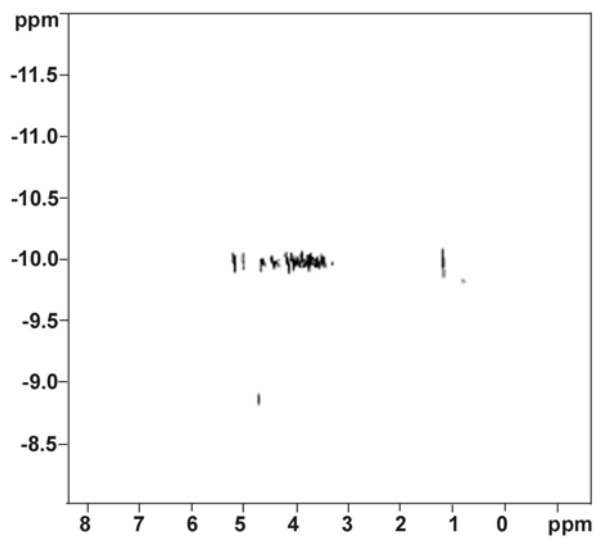

Supplemental Figure 3

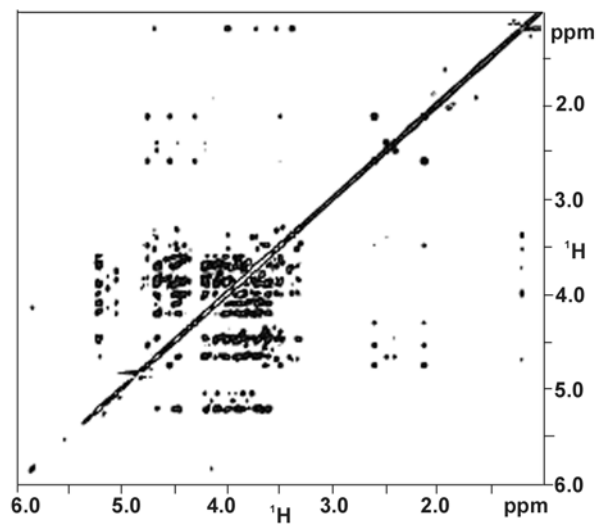

Supplemental Figure 4

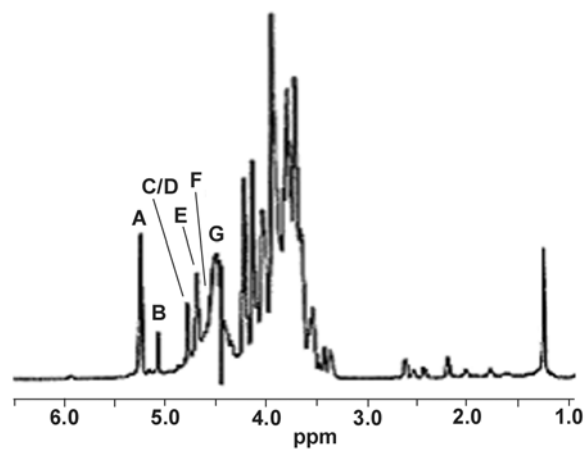

Supplemental Figure 5

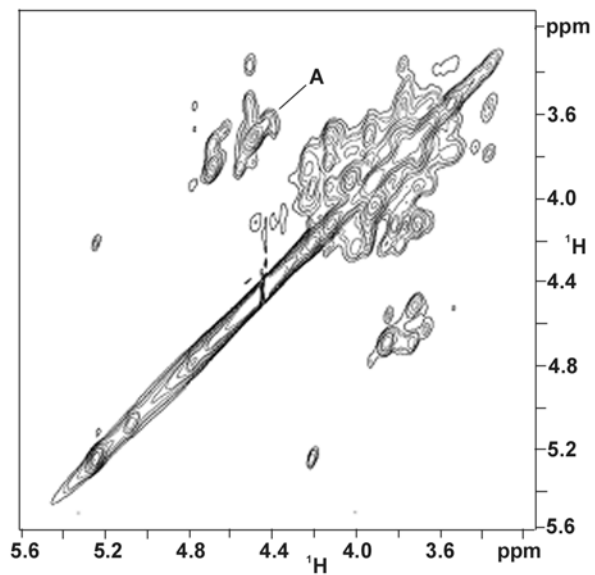

Supplemental Figure 6

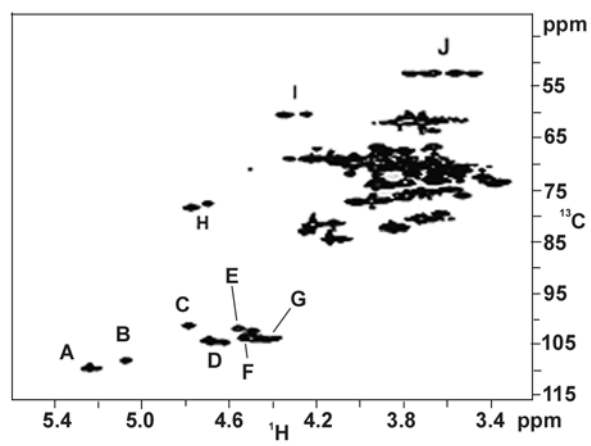

Supplemental Figure 7

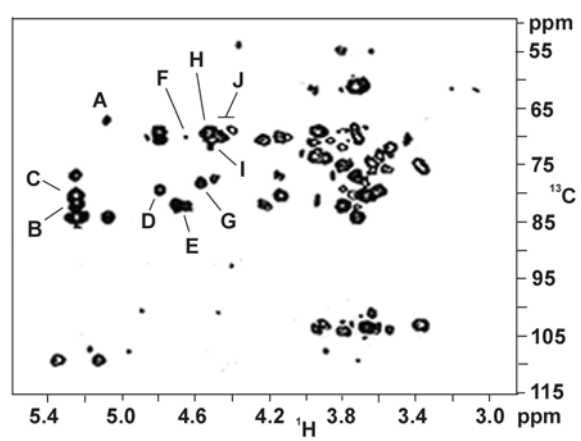

Supplemental Figure 8

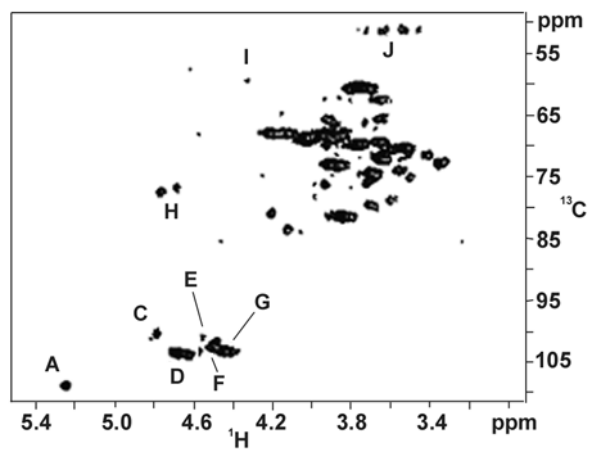

Supplemental Figure 9

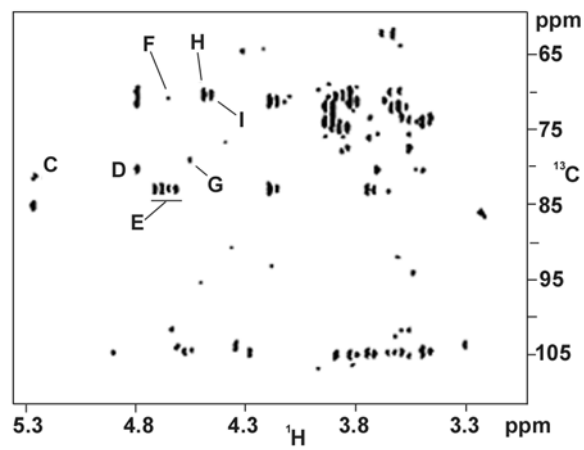



Supplemental Figure 10

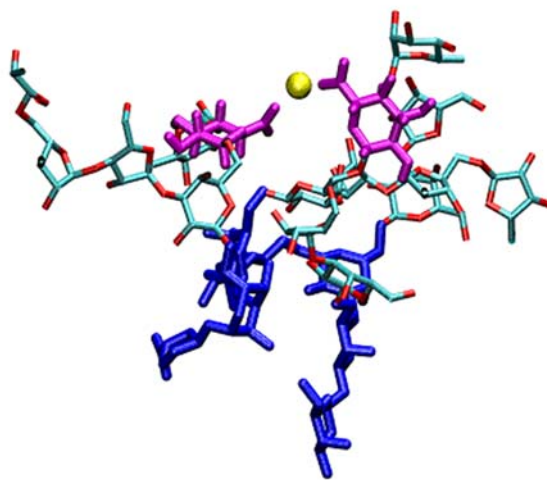

Supplement: supp_M109.100149_jbc.M109.100149-1.pdf [file supp_M109.100149_jbc.M109.100149-1.pdf]
